# Supplementary material
Source: MDPI journal article supplement (https://www.mdpi.com/1424-2818/14/1/50)
Supplement: s1 [file s1]

**Table S1:** Underwater video results metrics by habitat and overall result summaries. Frequency of Occurrence (FoO; %), MaxN means (standard error), and Density (Dens; ind./m2) means (standard error) were calculated for taxa present in  $\geq 5$  % of non-empty underwater videos. N represents the total number of video replicates by habitat.

|                                    |      | Habitat        |              |              |              |               |              |              | Overall      |
|------------------------------------|------|----------------|--------------|--------------|--------------|---------------|--------------|--------------|--------------|
|                                    |      | Seawall        | Jetty        | Dock         | BSJ Reef     | Restored Reef | Seagrass     | Sand         |              |
| <i>N</i>                           |      |                |              |              |              |               |              |              |              |
|                                    | FoO  | 4              | 12           | 39           | 17           | 212           | 29           | 28           | 341          |
|                                    | MaxN | 4              | 12           | 39           | 17           | 212           | 29           | 28           | 341          |
|                                    | Dens | 3              | 9            | 37           | 16           | 212           | 28           | 28           | 333          |
| <i>Lutjanus griseus</i>            |      |                |              |              |              |               |              |              |              |
|                                    | FoO  | 75             | 83           | 51           | 100          | -             | 17           | -            | 16           |
|                                    | MaxN | 1.500 (0.87)   | 2.917 (0.47) | 1.436 (0.38) | 4.000 (0.69) | -             | 0.31 (0.14)  | -            | 0.510 (0.08) |
|                                    | Dens | 0.296 (0.30)   | 0.173 (0.07) | 0.162 (0.08) | 0.493 (0.19) | -             | 0.067 (0.06) | -            | 0.055 (0.02) |
| <i>Mugil spp.</i>                  |      |                |              |              |              |               |              |              |              |
|                                    | FoO  | 75             | 50           | 56           | -            | -             | 34           | 29           | 14           |
|                                    | MaxN | 0.750 (0.25)   | 2.000 (1.03) | 1.590 (0.39) | -            | -             | 1.207 (0.47) | 1.179 (0.44) | 0.460 (0.09) |
|                                    | Dens | -              | 0.080 (0.08) | 0.066 (0.04) | -            | -             | 0.010 (0.01) | 0.030 (0.03) | 0.013 (0.01) |
| <i>Lagodon rhomboides</i>          |      |                |              |              |              |               |              |              |              |
|                                    | FoO  | -              | 8            | 31           | 6            | 6             | 38           | 18           | 13           |
|                                    | MaxN | -              | 0.167 (0.17) | 0.795 (0.24) | 0.059 (0.06) | 0.104 (0.04)  | 0.517 (0.15) | 0.179 (0.07) | 0.223 (0.04) |
|                                    | Dens | -              | 0.040 (0.04) | 0.027 (0.02) | -            | 0.026 (0.02)  | 0.053 (0.03) | 0.002 (0)    | 0.025 (0.01) |
| <i>Archosargus probatocephalus</i> |      |                |              |              |              |               |              |              |              |
|                                    | FoO  | -              | 42           | 49           | 41           | 1             | -            | -            | 10           |
|                                    | MaxN | -              | 0.500 (0.19) | 1.000 (0.23) | 0.529 (0.19) | 0.014 (0.01)  | -            | -            | 0.167 (0.03) |
|                                    | Dens | -              | -            | 0.117 (0.04) | 0.143 (0.08) | -             | -            | -            | 0.020 (0.01) |
| <i>Ariopsis felis</i>              |      |                |              |              |              |               |              |              |              |
|                                    | FoO  | -              | -            | 5            | -            | 15            | -            | -            | 10           |
|                                    | MaxN | -              | -            | 0.051 (0.04) | -            | 0.212 (0.04)  | -            | -            | 0.138 (0.03) |
|                                    | Dens | -              | -            | -            | -            | 0.177 (0.06)  | -            | -            | 0.113 (0.04) |
| Clupaeidae                         |      |                |              |              |              |               |              |              |              |
|                                    | FoO  | 50             | 17           | 5            | -            | -             | 45           | 14           | 7            |
|                                    | MaxN | 25.750 (16.68) | 8.750 (6.20) | 1.282 (0.89) | -            | -             | 7.828 (3.08) | 3.321 (1.61) | 1.695 (0.46) |

The following are Supplementary materials from: Baker, R. et al. Underwater video as a tool to quantify fish density in complex coastal habitats. Diversity 2022, 14, x. <https://doi.org/10.3390/xxxxx>

|                                 |      |              |              |              |              |              |              |              |              |
|---------------------------------|------|--------------|--------------|--------------|--------------|--------------|--------------|--------------|--------------|
|                                 | Dens | -            | 3.956 (3.53) | 0.030 (0.03) | -            | -            | 1.575 (0.92) | 0.081 (0.06) | 0.250 (0.13) |
| <i>Orthopristis chrysoptera</i> |      |              |              |              |              |              |              |              |              |
|                                 | FoO  | 50           | 8            | 10           | 12           | 3            | 14           | 7            | 6            |
|                                 | MaxN | 0.500 (0.29) | 0.083 (0.08) | 0.103 (0.05) | 0.118 (0.08) | 0.052 (0.02) | 0.172 (0.09) | 0.179 (0.13) | 0.088 (0.02) |
|                                 | Dens | -            | -            | -            | -            | 0.024 (0.02) | -            | -            | 0.015 (0.02) |
| Gobiidae/Bleniidae              |      |              |              |              |              |              |              |              |              |
|                                 | FoO  | -            | -            | -            | 12           | 6            | 3            | -            | 4            |
|                                 | MaxN | -            | -            | -            | 0.176 (0.13) | 0.066 (0.02) | 0.034 (0.03) | -            | 0.053 (0.01) |
|                                 | Dens | -            | -            | -            | 0.008 (0.01) | 0.176 (0.08) | -            | -            | 0.122 (0.05) |
| Gereidae                        |      |              |              |              |              |              |              |              |              |
|                                 | FoO  | -            | -            | 5            | 12           | -            | 14           | 21           | 4            |
|                                 | MaxN | -            | -            | 2.872 (2.82) | 0.118 (0.08) | -            | 1.828 (1.19) | 0.607 (0.33) | 0.540 (0.34) |
|                                 | Dens | -            | -            | -            | -            | -            | 0.161 (0.16) | 0.010 (0.01) | 0.014 (0.01) |
| <i>Cynoscion nebulosus</i>      |      |              |              |              |              |              |              |              |              |
|                                 | FoO  | -            | -            | -            | 6            | 5            | 7            | -            | 4            |
|                                 | MaxN | -            | -            | -            | 0.059 (0.06) | 0.057 (0.02) | 0.069 (0.05) | -            | 0.044 (0.01) |
|                                 | Dens | -            | -            | -            | -            | 0.048 (0.03) | -            | -            | 0.031 (0.02) |

**Table S2:** Within- and between-observer coefficient of variations (CV = standard deviation / mean) for estimates of horizontal visibility determined by each observer (A, B, C) in each video (three attempts per observer), averaged across videos. CV was calculated separately for all videos with estimated visibility ≥0.5 m and for subsets of videos with estimated visibilities at different ranges (0.5 to 1.0 m, > 1.0 to 1.5 m, > 1.5 m).

| Visibility (n) | Within-observer |       |       | Between Observer |
|----------------|-----------------|-------|-------|------------------|
|                | A               | B     | C     |                  |
| All (61-66)    | 0.054           | 0.033 | 0.041 | 0.045            |
| ≥0.5-1 (41-46) | 0.060           | 0.035 | 0.043 | 0.054            |
| >1-1.5 (15)    | 0.050           | 0.030 | 0.034 | 0.028            |
| >1.5 (5)       | 0.020           | 0.029 | 0.048 | 0.025            |
